# Supplementary material for: Unlocking the potential of biofuels via reaction pathways in van Krevelen diagrams
Source: Royal Society of Chemistry journal article supplement (doi:10.1039/d1gc01796a), 2021-01-01
Supplement: d1gc01796a2.csv [file d1gc01796a2.csv]

C	H	O
15	24	3
9	12	6
9	6	3
30	48	6
15	20	10
18	12	6
